# Supplementary material for: Flavonol Composition and Antioxidant Activity of Onions (Allium cepa L.) Based on the Development of New Analytical Ultrasound-Assisted Extraction Methods
Source: PubMed Central journal article supplement (PMC7916630; doi:10.3390/antiox10020273), 2021-02-10
Supplement: antioxidants-10-00273-s001.pdf [file antioxidants-10-00273-s001.pdf]

# Flavonol Composition and Antioxidant Activity of Onions (*Allium cepa* L.) Based on the Development of New Analytical Ultrasound-Assisted Extraction Methods

Ana V. González-de-Peredo, Mercedes Vázquez-Espinosa, Estrella Espada-Bellido, Ceferino Carrera, Marta Ferreiro-González, Gerardo F. Barbero \* and Miguel Palma

Department of Analytical Chemistry, Faculty of Sciences, University of Cadiz, Agrifood Campus of International Excellence (ceiA3), IVAGRO, 11510, Puerto Real, Cadiz, Spain; ana.velascogope@uca.es (A.V.G.-d.-P.); mercedes.vazquez@uca.es (M.V.-E.); estrella.espada@uca.es (E.E.-B.); marta.ferreiro@uca.es (M.F.-G.); ceferino.carrera@uca.es (C.C.); gerardo.fernandez@uca.es (G.F.B.); miguel.palma@uca.es (M.P.)

\* Correspondence: gerardo.fernandez@uca.es; Tel.: +34-956-01-6355

## SUPPLEMENTARY MATERIAL

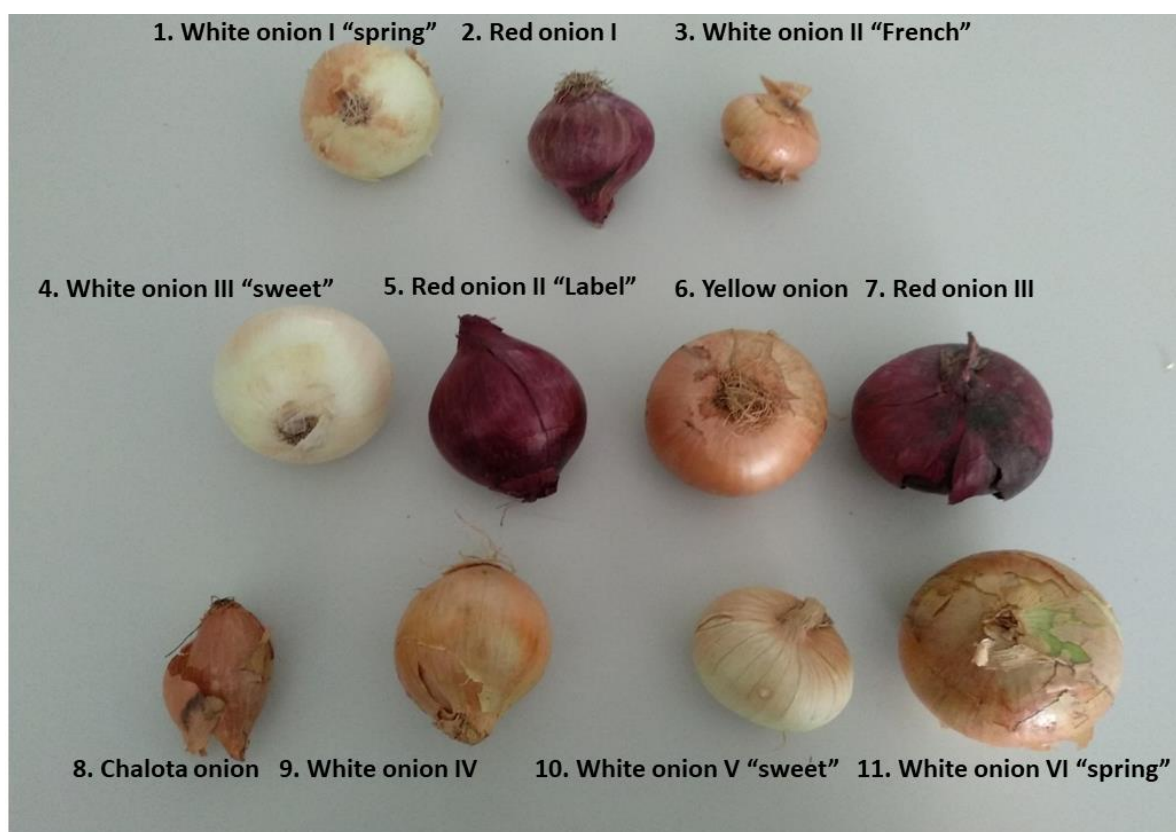

Figure S1. Photograph of each variety of onions studied.

**Table S1.** Characteristics of the onions studied.

| <b>Onion variety</b>        | <b>Color</b> | <b>Origin</b> | <b>Company</b> | <b>Caliber</b> |
|-----------------------------|--------------|---------------|----------------|----------------|
| 1. White onion I "spring"   | White        | Spain         | La Gramola     | 50/90 mm       |
| 2. Red onion I              | Red          | Spain         | La Gramola     | 50/70 mm       |
| 3. White onion II "French"  | White        | Spain         | La Gramola     | 37/55 mm       |
| 4. White onion III "sweet"  | White        | Chile         | -              | -              |
| 5. Red onion II "Label"     | Red          | Spain         | Linda          | 50/70 mm       |
| 6. Yellow onion             | Yellow       | Spain         | -              | -              |
| 7. Red onion III            | Red          | Spain         | Tara           | -              |
| 8. Chalota onion            | White        | French        | Tara           | 24 mm          |
| 9. White onion IV           | White        | New Zealand   | Tara           | 55 mm          |
| 10. White onion V "sweet"   | White        | Spain         | Tara           | 60/90 mm       |
| 11. White onion VI "spring" | White        | Spain         | Tara           | 65 mm          |
| 12. Red onion IV            | Red          | Austria       | Tara           | 50/90 mm       |
